# Supplementary material for: Bee Collected Pollen with Enhanced Health Benefits, Produced by Fermentation with a Kombucha Consortium
Source: MDPI journal article supplement (doi:10.3390/nu10101365), 2018-09-23
Supplement: s1 [file s1]

Article

Bee collected pollen with enhanced health benefits, produced by fermentation with a Kombucha consortium

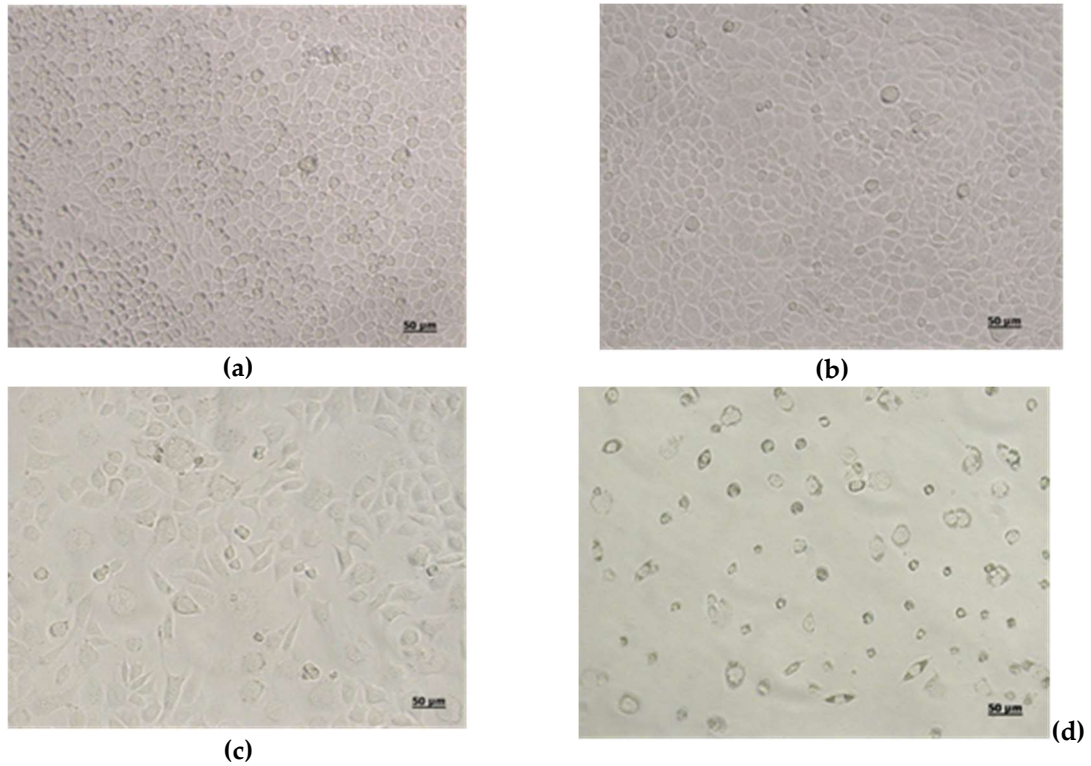

**Figure S1:** Light micrographs of NCTC clone L929 cells untreated (a) and treated with different concentrations of atomized product: 20 mg/ml (b), 25 mg/ml (c) and 30 mg/ml (d).

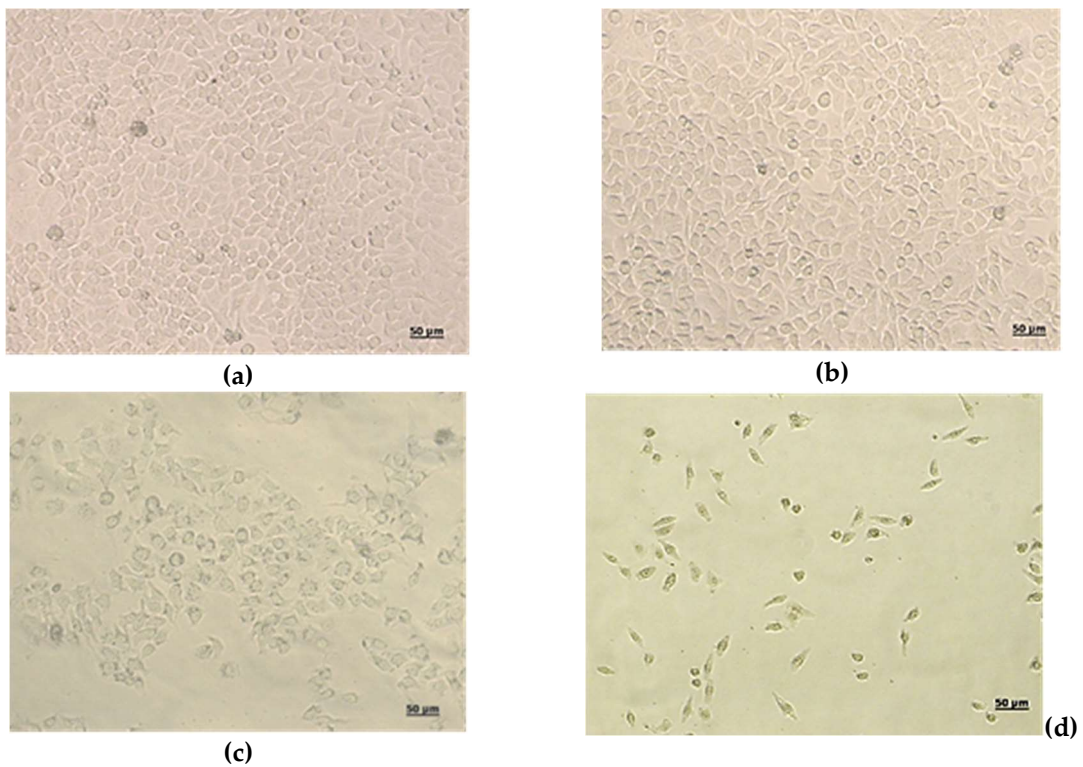

**Figure S2.** Light micrographs of Hep-2 cells untreated (a) and treated with different concentrations of atomized product: 15 mg/ml (b), 20 mg/ml (c) and 30 mg/ml (d).

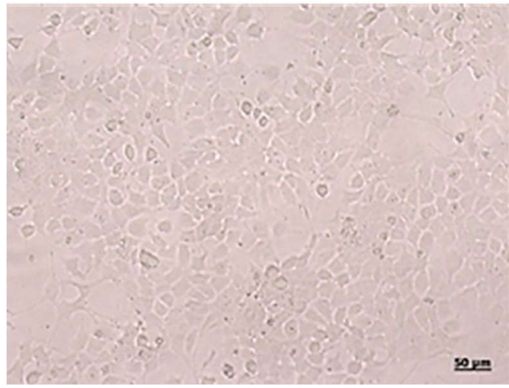

(a)

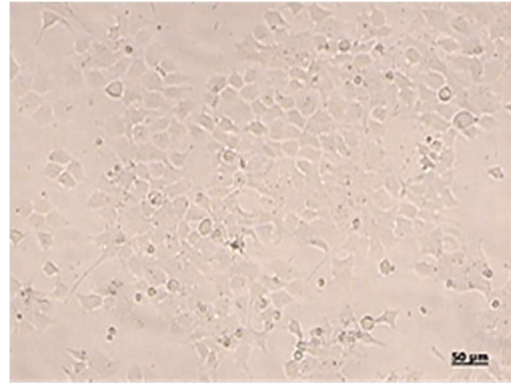

(b)

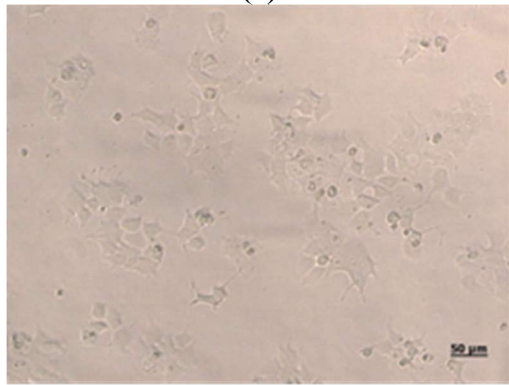

(c)

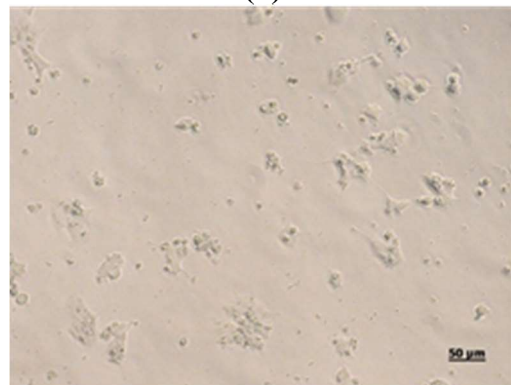

(d)

**Figure S3.** Light micrographs of Caco-2 cells untreated (a) and treated with different concentrations of atomized product: 10 mg/ml (b), 15 mg/ml (c) and 20 mg/ml (d).
